# Supplementary material
Source: HighWire-hosted journal article supplement (https://bjgp.org/highwire/filestream/39296/field_highwire_adjunct_files/0/bjgp20X710909_Suppl.pdf)
Supplement: bjgp20X710909_Suppl.pdf [file bjgp20X710909_Suppl.pdf]

**Table S1: Multivariate analysis of associations between job stress and practices characteristics in each country (Odds ratio and confidence interval, ordered logistic regression)**

|                                              | 1.Australia<br>747  | 2.Canada<br>2284     | 3.France<br>502     | 4.Germany<br>559      | 5.Netherlands<br>618 | 6.NZ<br>503         | 7.Norway<br>864     | 8.Sweden<br>2905    | 9.CH<br>1065        | 10.UK<br>1001       | 11.US<br>1001       |
|----------------------------------------------|---------------------|----------------------|---------------------|-----------------------|----------------------|---------------------|---------------------|---------------------|---------------------|---------------------|---------------------|
| <b>Sex – ref male</b>                        |                     |                      |                     |                       |                      |                     |                     |                     |                     |                     |                     |
| Female                                       | 1.08<br>[0.74-1.56] | 1.62<br>[1.29-2.05]  | 1.13<br>[0.71-1.80] | 1.80<br>[1.15-2.81]   | 1.48<br>[0.96-2.29]  | 1.21<br>[0.79-1.85] | 1.26<br>[0.92-1.72] | 1.83<br>[1.54-2.19] | 1.06<br>[0.74-1.52] | 0.84<br>[0.63-1.13] | 1.26<br>[0.90-1.77] |
| <b>Age- ref &lt;35 yrs</b>                   |                     |                      |                     |                       |                      |                     |                     |                     |                     |                     |                     |
| 35-44                                        | 0.97<br>[0.54-1.74] | 0.90<br>[0.67-1.3]   | 0.60<br>[0.25-1.3]  | 0.20<br>[0.6-1.0]     | 1.81<br>[1.1-2.9]    | 1.06<br>[0.6-1.9]   | 1.04<br>[0.6-1.8]   | 1.44<br>[1-2]       | 1.47<br>[0.4-5.4]   | 1.27<br>[0.8-2]     | 2.04<br>[1-4]       |
| 45-54                                        | 0.83<br>[0.47-1.47] | 1.1<br>[0.78-1.56]   | 0.83<br>[0.4-1.8]   | 0.50<br>[0.1-2.1]     | 1.57<br>[0.9-2.6]    | 0.83<br>[0.5-1.4]   | 1.08<br>[0.6-1.9]   | 2.05<br>[1.5-2.9]   | 1.27<br>[0.3-4.7]   | 1.27<br>[0.7-2.1]   | 2.18<br>[1.2-4]     |
| 55-64                                        | 0.86<br>[0.46-1.61] | 1.1<br>[0.78-1.58]   | 0.54<br>[0.2-1.2]   | 0.30<br>[0.1-1.2]     | 1.22<br>[0.7-2.1]    | 0.88<br>[0.5-1.6]   | 0.70<br>[0.4-1.2]   | 1.73<br>[1.25-2.4]  | 0.76<br>[0.2-2.8]   | 1.36<br>[0.8-2.3]   | 2.20<br>[1.1-4.2]   |
| 65 or older                                  | 0.32<br>[0.13-0.81] | 0.50<br>[0.34-0.83]  | 0.28<br>[0.1-0.9]   | 0.20<br>[0.05-0.9]    | 0.40<br>[0.05-3.00]  | 0.72<br>[0.3-1.8]   | 0.27<br>[0.1-0.6]   | 0.914<br>[0.6-1.3]  | 0.36<br>[1-1.4]     | 0.80<br>[0.3-1.7]   | 1.50<br>[0.7-3.3]   |
| <b>Area – Ref rural</b>                      |                     |                      |                     |                       |                      |                     |                     |                     |                     |                     |                     |
| Urban                                        | 1.04<br>[0.68-1.58] | 1.34<br>[1.06-1.7]   | 1.73<br>[1.1-2.7]   | 0.91<br>[0.6-1.5]     | 1.52<br>[1-2.3]      | 1.12<br>[0.7-1.7]   | 1.49<br>[1.00-2.00] | 1.39<br>[1.1-1.7]   | 1.05<br>[0.8-1.4]   | 1.34<br>[1.00-1.8]  | 1.31<br>[1.00-1.8]  |
| <b>Practice FTE – Ref &lt;3</b>              |                     |                      |                     |                       |                      |                     |                     |                     |                     |                     |                     |
| 3-5                                          | 1.31<br>[0.71-2.42] | 1.10<br>[0.8-1.4]    | 1.40<br>[0.6-3.1]   | 0.92<br>[0.5-1.6]     | 1.23<br>[0.8-1.8]    | 1.00<br>[0.5-1.7]   | 1.02<br>[0.7-1.6]   | 0.77<br>[0.6-1.00]  | 1.07<br>[0.75-1.5]  | 1.42<br>[1.00-2.1]  | 1.39<br>[1.00-2.00] |
| >5                                           | 1.11<br>[0.59-2.07] | 0.90<br>[0.68-1.19]  | 25.00<br>[7.3-84]   | 11.50<br>[0.7-188.00] | 1.71<br>[0.5-5.4]    | 1.83<br>[1-3.5]     | 0.75<br>[0.4-1.2]   | 0.66<br>[0.5-0.9]   | 1.12<br>[0.7-1.9]   | 1.75<br>[1.1-2.7]   | 1.10<br>[0.8-1.6]   |
| <b>Home visits – Ref Yes</b>                 |                     |                      |                     |                       |                      |                     |                     |                     |                     |                     |                     |
| No                                           | 0.91<br>[0.46-1.80] | 1.11<br>[0.85-1.54]  | 1.40<br>[0.6-3.1]   | 0.88<br>[0.4-2]       | -                    | 1.06<br>[0.1-8.2]   | 0.80<br>[0.1-4.1]   | 0.91<br>[0.6-1.00]  | 0.75<br>[0.5-1.2]   | 0.80<br>[0.04-1.3]  | 1.05<br>[0.6-1.8]   |
| occasionally                                 | 0.79<br>[0.51-1.22] | 1.14<br>[0.855-1.54] | 1.05<br>[0.65-1.7]  | 1.36<br>[0.8-2.3]     | 0.66<br>[0.4-1.2]    | 0.85<br>[0.5-1.4]   | 0.90<br>[0.6-1.3]   | 1.01<br>[0.8-1.3]   | 1.05<br>[0.8-1.4]   | 0.78<br>[0.5-1]     | 1.31<br>[0.7-2.4]   |
| <b>Weekly workload- Ref &lt;=40 hours</b>    |                     |                      |                     |                       |                      |                     |                     |                     |                     |                     |                     |
| 41-50                                        | 2.13<br>[1.38-3.32] | 1.73<br>[1.33-2.26]  | 1.30<br>[0.7-2.3]   | 2.45<br>[1.4-4.2]     | 1.38<br>[0.8-2.3]    | 1.73<br>[1-2.9]     | 2.00<br>[1.4-2.7]   | 2.02<br>[1.7-2.4]   | 1.60<br>[1.1-2.3]   | 0.74<br>[0.5-1.00]  | 1.72<br>[1.2-2.5]   |
| >50                                          | 3.42<br>[1.68-6.93] | 2.51<br>[1.85-3.40]  | 1.72<br>[1-3]       | 4.77<br>[2.7-8.4]     | 2.73<br>[1.6-4.8]    | 3.14<br>[1.3-7.5]   | 5.24<br>[3.00-9.5]  | 3.49<br>[2.1-5.7]   | 2.6<br>[1.8-4.00]   | 1.34<br>[1.00-2.00] | 3.26<br>[2.2-4.8]   |
| <b>% Admin task - Ref &lt;=10%</b>           |                     |                      |                     |                       |                      |                     |                     |                     |                     |                     |                     |
| 11-20%                                       | 0.89<br>[0.59-1.32] | 1.37<br>[1.07-1.76]  | 1.95<br>[1.2-3.1]   | 1.25<br>[0.7-2.2]     | 1.18<br>[0.7-2]      | 0.85<br>[0.5-1.4]   | 0.90<br>[0.6-1.3]   | 1.13<br>[0.9-1.5]   | 1.82<br>[1.3-2.6]   | 0.85<br>[0.6-1.2]   | 1.29<br>[0.9-1.9]   |
| >20%                                         | 1.35<br>[0.61-2.99] | 1.73<br>[1.3-2.32]   | 2.61<br>[1.3-5.1]   | 3.39<br>[1.9-6]       | 2.04<br>[1.1-3.6]    | 1.16<br>[0.7-2]     | 2.00<br>[1.1-3.00]  | 1.50<br>[1.2-2]     | 2.70<br>[1.8-4.00]  | 1.39<br>[1-2]       | 1.30<br>[0.9-1.9]   |
| <b>% same-day appointment– Ref &gt;=60 %</b> |                     |                      |                     |                       |                      |                     |                     |                     |                     |                     |                     |
| about50%                                     | 0.97<br>[0.6-1.68]  | 1.21<br>[0.9-1.65]   | 1.71<br>[1-3.2]     | 1.26<br>[0.5-3.4]     | 1.25<br>[0.8-2]      | 1.76<br>[0.9-3.5]   | 1.85<br>[1.1-3.00]  | 1.49<br>[1.2-1.9]   | 1.54<br>[1.00-2.5]  | 0.64<br>[0.4-0.9]   | 1.11<br>[0.7-1.7]   |
| 20-40%                                       | 1.06<br>[0.5-2.3]   | 1.57<br>[1.2-2.1]    | 2.00<br>[1.00-4.3]  | 1.02<br>[0.4-2.5]     | 1.55<br>[0.5-4.5]    | 1.48<br>[0.6-4]     | 2.30<br>[1.4-3.7]   | 1.75<br>[1.4-2.2]   | 2.47<br>[1.3-4.6]   | 0.65<br>[0.3-1.3]   | 1.44<br>[0.7-2.7]   |

|                                                                  |                      |                    |                    |                    |                    |                     |                      |                    |                    |                      |                   |
|------------------------------------------------------------------|----------------------|--------------------|--------------------|--------------------|--------------------|---------------------|----------------------|--------------------|--------------------|----------------------|-------------------|
| <20%                                                             | 1.61<br>[0.87-3.0]   | 1.28<br>[0.9-1.8]  | 2.05<br>[0.8-5.3]  | 1.91<br>[0.55-6.6] | 1.58<br>[0.4-5.8]  | 0.55<br>[0.06-4.8]  | 2.38<br>[1.2-5.00]   | 2.47<br>[2-3.2]    | 2.16<br>[0.8-5.5]  | 1.10<br>[0.5-2.5]    | 1.22<br>[0.6-2.3] |
| <b>Consultation duration – Ref &lt;10</b>                        |                      |                    |                    |                    |                    |                     |                      |                    |                    |                      |                   |
| 10-20                                                            | 1.3<br>[0.79-2.33]   | 0.85<br>[0.64-1.1] | 1.61<br>[0.4-6.2]  | 1.23<br>[0.7-2.1]  | 1.12<br>[0.7-1.7]  | 0.77<br>[0.4-1.8]   | 0.84<br>[0.1-4.4]    | 0.36<br>[0.2-0.7]  | 0.70<br>[0.4-1.3]  | 1.10<br>[0.7-1.6]    | 1.35<br>[0.8-2.2] |
| >20                                                              | 0.65<br>[0.21-2.03]  | 0.60<br>[0.4-0.89] | 1.32<br>[0.3-5.4]  | 1.30<br>[0.4-3.8]  | -                  | 0.25<br>[0.01-6.2]  | 0.89<br>[0.1-5.00]   | 0.26<br>[0.1-0.5]  | 0.40<br>[0.2-0.8]  | 0.02<br>[0.007-1.00] | 1.02<br>[0.6-1.8] |
| <b>Performance comparisons– Ref No</b>                           |                      |                    |                    |                    |                    |                     |                      |                    |                    |                      |                   |
| Yes                                                              | 0.95<br>[0.65-1.39]  | 1.30<br>[1-1.6]    | 1.81<br>[1.1-2.9]  | 0.97<br>[0.6-1.5]  | 0.85<br>[0.6-1.25] | 0.77<br>[0.4-1.5]   | 1.03<br>[0.7-1.6]    | 1.08<br>[1.00-1.3] | 1.08<br>[0.8-1.4]  | 1.13<br>[0.8-1.6]    | 1.38<br>[1-2]     |
| <b>Delay in receiving discharge information –Ref &lt;2j</b>      |                      |                    |                    |                    |                    |                     |                      |                    |                    |                      |                   |
| 2j-2 sem                                                         | 1.14<br>[0.77-1.69]  | 1.31<br>[1.0-1.7]  | 1.30<br>[0.7-2.3]  | 1.28<br>[0.8-2.1]  | 1.04<br>[0.7-1.6]  | 0.95<br>[0.6-1.45]  | 1.02<br>[0.7-1.5]    | 1.32<br>[1.00-1.6] | 1.23<br>[1-1.7]    | 1.34<br>[1-1.9]      | 0.97<br>[0.7-1.3] |
| 3-4sem                                                           | 1.97<br>[0.82-4.73]  | 1.70<br>[1.1-2.4]  | 2.08<br>[1-4]      | 1.15<br>[0.4-3.2]  | 0.85<br>[0.6-1.2]  | 3.55<br>[0.4-31.00] | 1.65<br>[0.8-3.5]    | 1.75<br>[1.2-2.6]  | 1.35<br>[0.7-2.7]  | 1.81<br>[1.1-3]      | 1.85<br>[0.7-5.1] |
| >1 mois ou jamais                                                | 2.25<br>[0.44-11.35] | 1.70<br>[1.00-2.8] | 2.73<br>[1.00-7.2] | 1.32<br>[0.3-6.4]  | 0.45<br>[0.02-7.6] | -                   | 8.23<br>[0.1-553.00] | 1.32<br>[0.8-2.00] | 0.65<br>[0.3-1.2]  | 2.24<br>[0.7-7.1]    | 1.45<br>[0.7-3.1] |
| <b>Contact with home care providers – ref Routinely</b>          |                      |                    |                    |                    |                    |                     |                      |                    |                    |                      |                   |
| Occasionally                                                     | 0.74<br>[0.46-1.18]  | 0.90<br>[0.7-1.2]  | 0.70<br>[0.4-1.3]  | 1.35<br>[0.8-2.3]  | 0.76<br>[0.5-1.2]  | 1.11<br>[0.6-2]     | 0.85<br>[0.6-1.2]    | 1.07<br>[0.9-1.7]  | 0.70<br>[0.5-0.9]  | 1.01<br>[0.7-1.4]    | 0.91<br>[0.8-1.6] |
| Never                                                            | 0.82<br>[0.33-2.10]  | 0.60<br>[0.37-1.0] | 0.70<br>[0.2-2.1]  | 1.68<br>[0.4-6.6]  | 0.37<br>[0.01-31]  | 1.76<br>[0.5-5.9]   | 2.34<br>[0.4-23.00]  | 0.88<br>[0.4-1.8]  | 0.13<br>[0.04-0.4] | 0.99<br>[0.4-2.3]    | 1.10<br>[0.4-3.3] |
| <b>Working with a case manager – ref Yes within the practice</b> |                      |                    |                    |                    |                    |                     |                      |                    |                    |                      |                   |
| No or outside                                                    | 1.50<br>[0.92-2.43]  | 1.10<br>[0.9-1.4]  | 1.24<br>[0.7-2.3]  | 0.56<br>[0.3-0.9]  | 1.15<br>[0.7-2]    | 1.27<br>[0.8-2.00]  | 1.03<br>[0.7-1.5]    | 1.40<br>[1.1-1.7]  | 1.51<br>[0.9-2.6]  | 0.96<br>[0.6-1.6]    | 1.18<br>[0.9-1.6] |
| <b>Use of EHR –ref No</b>                                        |                      |                    |                    |                    |                    |                     |                      |                    |                    |                      |                   |
| Yes                                                              | 1.70<br>[0.87-3.20]  | 0.80<br>[0.6-1.1]  | 1.09<br>[0.6-2]    | 0.84<br>[0.4-1.5]  | 1.60<br>[0.4-7.5]  | 4.50<br>[0.5-44.00] | 1.31<br>[0.4-3.8]    | 0.39<br>[0.1-1.2]  | 0.90<br>[0.6-1.2]  | 0.63<br>[0.2-2.3]    | 1.59<br>[0.8-3.2] |
| <b>Use of E-alert drug prescription –ref No</b>                  |                      |                    |                    |                    |                    |                     |                      |                    |                    |                      |                   |
| Yes, routinely                                                   | 0.50<br>[0.23-1.00]  | 1.20<br>[0.9-1.5]  | 1.20<br>[0.6-2.2]  | 1.11<br>[0.7-1.9]  | 2.29<br>[0.2-22]   | 1.72<br>[0.4-7.00]  | 1.58<br>[0.8-3.00]   | 1.11<br>[0.8-1.6]  | 1.27<br>[0.9-1.8]  | 0.91<br>[0.3-2.7]    | 0.94<br>[0.5-1.8] |
| Yes, occasionally                                                | 0.72<br>[0.25-2.1]   | 1.00<br>[0.8-1.5]  | 1.17<br>[0.6-2.2]  | 2.49<br>[1.3-4.7]  | 2.15<br>[0.2-25]   | 2.26<br>[0.5-10]    | 1.92<br>[1.00-4.00]  | 1.36<br>[0.9-2.1]  | 1.03<br>[0.7-1.5]  | 1.20<br>[0.4-4.00]   | 1.30<br>[0.6-2.8] |

**FTE: Full-time equivalent / HER: Electronic health record**

For each country, the multivariate model includes all the same independent variables listed in the Table.
